# Supplementary material
Source: PubMed Central journal article supplement (PMC3504790)
Supplement: supp_M112.411181_jbc.M112.411181-3.pdf [file supp_M112.411181_jbc.M112.411181-3.pdf]

## Supplemental Figure 3

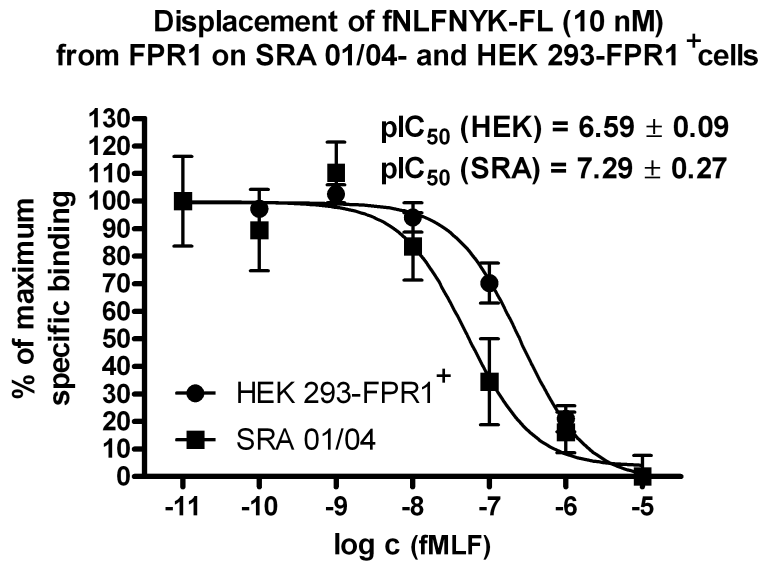

**Figure S3:** Binding sites for fNLFNYK-FL are pharmacologically similar on SRA 01/04 lens epithelial cells and FPR1-transfected HEK 293 cells. Competition binding assays were performed with fNLFNYK-FL (10 nM) and increasing concentrations of fMLF, using HEK 293-FPR1<sup>+</sup> (●) or SRA 01/04 (■) cells. The curves contain the data of two independent experiments with 2-3 replicates. In each experiment, both cell lines were tested on the same day under the same conditions.
