# Supplementary material
Source: PubMed Central journal article supplement (PMC3504790)
Supplement: supp_M112.411181_jbc.M112.411181-4.pdf [file supp_M112.411181_jbc.M112.411181-4.pdf]

## Supplemental Figure 4

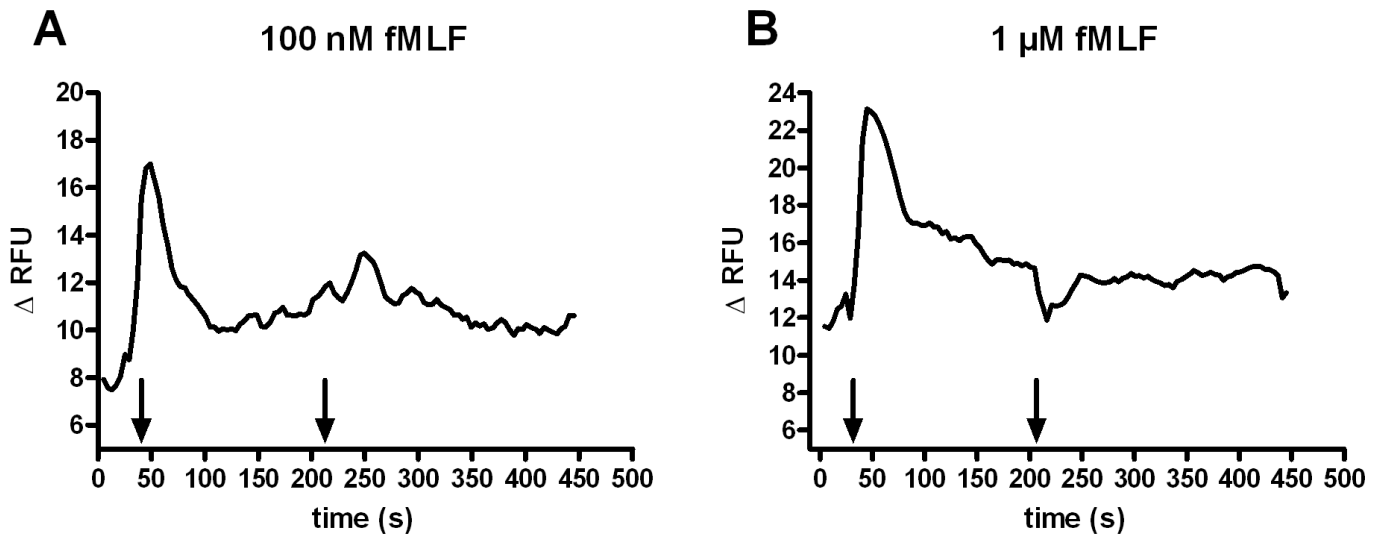

**Figure S4:** Homologous Desensitization of the FPR1 signal in FHL 124 cells. After a baseline recording of 30 s, a  $\text{Ca}^{2+}$  signal was induced with 100 nM (A) or 1  $\mu$ M (B) of the FPR1 agonist fMLF. 180 s later, the same amount of agonist was added again and the measurement was continued for another 240 s. The times of agonist addition are indicated by the arrows. The curves were generated by subtraction of the curve obtained with buffer alone (background) from the curve obtained with 100 nM or 1  $\mu$ M of fMLF. Each graph represents the average of three measurements performed in two independent experiments.
