# Supplementary material
Source: PubMed Central journal article supplement (PMC3504790)
Supplement: supp_M112.411181_jbc.M112.411181-5.pdf [file supp_M112.411181_jbc.M112.411181-5.pdf]

Supplemental Figure 5

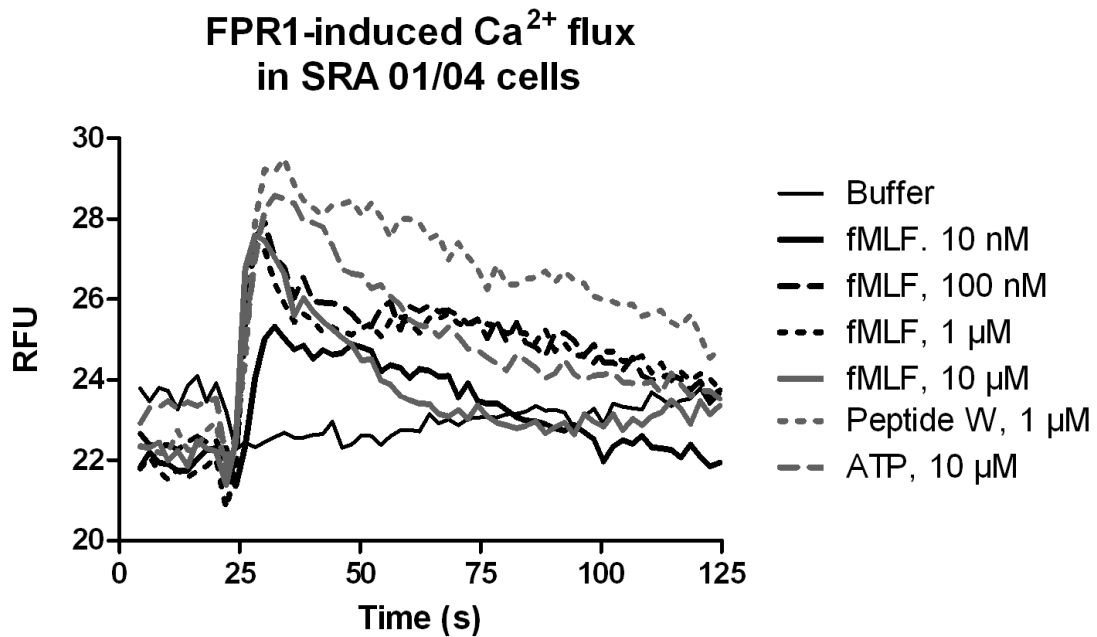

**Figure S5:** The FPR1 agonist fMLF induces calcium flux responses in SRA 01/04 lens epithelial cells in a concentration-dependent manner. The graph shows individual traces for the effects of various fMLF concentrations (indicated in the inset) on intracellular calcium flux in SRA 01/04 cells from a plate reader based experiment.
